# Supplementary material
Source: PubMed Central journal article supplement (PMC3632483)
Supplement: 629fad50eced43f3fe2408e85f4cd1b3_genetics.112.148882-1.pdf [file 629fad50eced43f3fe2408e85f4cd1b3_genetics.112.148882-1.pdf]

**Table S1 Knob counts of 302 individuals from 37 landraces.** Ab10-III is a variant that is very similar in structure to Ab10-I (KANIZAY *et al.* 2012).

| GRIN ID       | Location               | Chromosome 10 type | TR-1 knobs | 180-bp knobs | Mixed knobs |
|---------------|------------------------|--------------------|------------|--------------|-------------|
| AMES 19880-1  | Puebla, Mexico         | Ab10-I             | 1          | 0            | 9           |
| AMES 19880-2  | Puebla, Mexico         | N10                | 2          | 3            | 2           |
| AMES 19880-3  | Puebla, Mexico         | N10                | 2          | 5            | 2           |
| AMES 19880-4  | Puebla, Mexico         | N10                | 1          | 5            | 3           |
| AMES 19880-5  | Puebla, Mexico         | N10                | 2          | 7            | 3           |
| AMES 19880-6  | Puebla, Mexico         | Ab10-I             | 1          | 1            | 3           |
| AMES 19880-7  | Puebla, Mexico         | N10                | 2          | 4            | 3           |
| AMES 19880-8  | Puebla, Mexico         | N10                | 1          | 5            | 4           |
| AMES 19980-1  | Mexico, Oaxana         | K10L2              | 1          | 11           | 11          |
| AMES 19980-2  | Mexico, Oaxana         | Ab10-III           | 0          | 12           | 16          |
| AMES 19980-3  | Mexico, Oaxana         | N10                | 0          | 13           | 16          |
| AMES 19980-4  | Mexico, Oaxana         | N10                | 0          | 14           | 12          |
| AMES 19980-5  | Mexico, Oaxana         | N10                | 0          | 13           | 12          |
| AMES 19980-6  | Mexico, Oaxana         | Ab10-III           | 3          | 13           | 8           |
| AMES 19980-7  | Mexico, Oaxana         | N10                | 1          | 12           | 8           |
| AMES 19980-8  | Mexico, Oaxana         | Ab10-III           | 0          | 12           | 15          |
| AMES 19980-9  | Mexico, Oaxana         | N10                | 0          | 16           | 13          |
| AMES 19980-10 | Mexico, Oaxana         | N10                | 0          | 12           | 16          |
| AMES 19980-11 | Mexico, Oaxana         | N10                | 0          | 10           | 13          |
| AMES 19980-12 | Mexico, Oaxana         | N10                | 0          | 14           | 13          |
| AMES 19980-13 | Mexico, Oaxana         | N10                | 0          | 10           | 11          |
| AMES 19980-14 | Mexico, Oaxana         | Ab10-III           | 1          | 13           | 12          |
| AMES 19980-15 | Mexico, Oaxana         | Ab10-III           | 2          | 12           | 10          |
| AMES 19980-16 | Mexico, Oaxana         | Ab10-III           | 0          | 15           | 12          |
| AMES 19980-17 | Mexico, Oaxana         | Ab10-III           | 0          | 11           | 13          |
| AMES 19980-18 | Mexico, Oaxana         | AB10-III           | 0          | 11           | 15          |
| AMES 19980-19 | Mexico, Oaxana         | N10                | 0          | 11           | 13          |
| AMES 19980-20 | Mexico, Oaxana         | N10                | 0          | 14           | 10          |
| AMES 19980-21 | Mexico, Oaxana         | Ab10-III           | 0          | 13           | 10          |
| AMES 19980-22 | Mexico, Oaxana         | K10L2              | 1          | 11           | 11          |
| AMES 19980-23 | Mexico, Oaxana         | N10                | 1          | 13           | 11          |
| AMES 21972-1  | US, Illinois           | K10L2              | 1          | 10           | 6           |
| AMES 21972-2  | US, Illinois           | K10L2              | 1          | 10           | 8           |
| AMES 21972-3  | US, Illinois           | K10L2              | 1          | 10           | 7           |
| AMES 21972-4  | US, Illinois           | K10L2              | 1          | 12           | 8           |
| NSL 18-1      | Cundinamarca, Colombia | Ab10-III           | 2          | 7            | 6           |
| NSL 18-2      | Cundinamarca, Colombia | N10                | 2          | 8            | 4           |
| NSL 18-3      | Cundinamarca, Colombia | N10                | 2          | 11           | 2           |
| NSL 18-4      | Cundinamarca, Colombia | N10                | 0          | 10           | 1           |

|               |                        |          |   |    |    |
|---------------|------------------------|----------|---|----|----|
| NSL 18-5      | Cundinamarca, Colombia | K10L2    | 2 | 7  | 2  |
| NSL 18-6      | Cundinamarca, Colombia | N10      | 1 | 12 | 3  |
| NSL 18-7      | Cundinamarca, Colombia | N10      | 1 | 10 | 3  |
| NSL 18-8      | Cundinamarca, Colombia | N10      | 0 | 10 | 6  |
| NSL 18-9      | Cundinamarca, Colombia | N10      | 0 | 13 | 3  |
| NSL 18-10     | Cundinamarca, Colombia | N10      | 2 | 6  | 5  |
| NSL 18-11     | Cundinamarca, Colombia | N10      | 2 | 10 | 1  |
| NSL 18-12     | Cundinamarca, Colombia | N10      | 1 | 10 | 7  |
| NSL 18-13     | Cundinamarca, Colombia | N10      | 2 | 11 | 2  |
| NSL 2824-1    | Mexico                 | N10      | 2 | 4  | 2  |
| NSL 2824-2    | Mexico                 | N10      | 0 | 6  | 2  |
| NSL 2824-3    | Mexico                 | N10      | 2 | 4  | 4  |
| NSL 2824-4    | Mexico                 | N10      | 0 | 4  | 3  |
| NSL 2824-5    | Mexico                 | N10      | 1 | 3  | 4  |
| NSL 2824-6    | Mexico                 | N10      | 2 | 2  | 3  |
| NSL 2824-7    | Mexico                 | N10      | 0 | 4  | 4  |
| NSL 2824-8    | Mexico                 | N10      | 2 | 5  | 2  |
| NSL 2824-9    | Mexico                 | N10      | 1 | 2  | 4  |
| NSL 2824-10   | Mexico                 | K10L2    | 0 | 4  | 2  |
| NSL 2824-11   | Mexico                 | N10      | 0 | 5  | 7  |
| NSL 2824-12   | Mexico                 | N10      | 0 | 3  | 6  |
| NSL 2824-13   | Mexico                 | N10      | 0 | 3  | 5  |
| NSL 2824-14   | Mexico                 | K10L2    | 0 | 2  | 8  |
| NSL 2824-15   | Mexico                 | K10L2    | 0 | 4  | 6  |
| NSL 2824 - 16 | Mexico                 | N10      | 0 | 5  | 6  |
| NSL 2827-1    | Mexico                 | K10L2    | 0 | 11 | 9  |
| NSL 2827-2    | Mexico                 | K10L2    | 0 | 12 | 7  |
| NSL 2827-3    | Mexico                 | K10L2    | 0 | 10 | 8  |
| NSL 2827-4    | Mexico                 | K10L2    | 1 | 10 | 8  |
| NSL 2827-5    | Mexico                 | K10L2    | 0 | 11 | 8  |
| NSL 2827-6    | Mexico                 | N10      | 0 | 15 | 7  |
| NSL 2827-7    | Mexico                 | K10L2    | 0 | 13 | 8  |
| NSL 2827-8    | Mexico                 | N10      | 0 | 11 | 8  |
| NSL 2827-9    | Mexico                 | N10      | 0 | 13 | 6  |
| NSL 2828-1    | Mexico                 | Ab10-III | 1 | 13 | 8  |
| NSL 2828-2    | Mexico                 | N10      | 0 | 13 | 11 |
| NSL 2828-3    | Mexico                 | N10      | 4 | 14 | 9  |
| NSL 2828-4    | Mexico                 | N10      | 0 | 10 | 12 |
| NSL 2828-5    | Mexico                 | N10      | 0 | 9  | 13 |
| NSL 2828-6    | Mexico                 | Ab10-III | 0 | 12 | 12 |
| NSL 2828-7    | Mexico                 | Ab10-III | 1 | 10 | 12 |
| NSL 2828-8    | Mexico                 | N10      | 0 | 12 | 13 |

|             |        |          |   |    |    |
|-------------|--------|----------|---|----|----|
| NSL 2828-9  | Mexico | N10      | 0 | 10 | 16 |
| NSL 2828-10 | Mexico | Ab10-III | 0 | 10 | 14 |
| NSL 2828-11 | Mexico | N10      | 1 | 13 | 14 |
| NSL 2828-12 | Mexico | Ab10-III | 0 | 12 | 15 |
| NSL 2828-13 | Mexico | N10      | 1 | 11 | 10 |
| NSL 2828-14 | Mexico | Ab10-III | 0 | 13 | 13 |
| NSL 2828-15 | Mexico | N10      | 2 | 10 | 9  |
| NSL 2828-16 | Mexico | N10      | 1 | 13 | 8  |
| NSL 2833-1  | Mexico | N10      | 0 | 12 | 11 |
| NSL 2833-2  | Mexico | N10      | 1 | 9  | 9  |
| NSL 2833-3  | Mexico | N10      | 1 | 11 | 7  |
| NSL 2833-4  | Mexico | N10      | 2 | 9  | 9  |
| NSL 2833-5  | Mexico | N10      | 1 | 8  | 9  |
| NSL 2833-6  | Mexico | N10      | 1 | 9  | 9  |
| NSL 2833-7  | Mexico | N10      | 1 | 7  | 7  |
| NSL 2836-1  | Mexico | N10      | 0 | 10 | 10 |
| NSL 2836-2  | Mexico | N10      | 0 | 12 | 7  |
| NSL 2836-3  | Mexico | N10      | 2 | 10 | 9  |
| NSL 2836-4  | Mexico | N10      | 1 | 9  | 9  |
| NSL 2836-5  | Mexico | N10      | 1 | 8  | 9  |
| NSL 2836-6  | Mexico | N10      | 0 | 10 | 10 |
| NSL 2836-7  | Mexico | N10      | 0 | 11 | 10 |
| NSL 2837-1  | Mexico | N10      | 0 | 8  | 3  |
| NSL 2837-2  | Mexico | N10      | 1 | 6  | 6  |
| NSL 2840-1  | Mexico | Ab10-III | 0 | 13 | 12 |
| NSL 2840-2  | Mexico | N10      | 0 | 10 | 10 |
| NSL 2840-3  | Mexico | N10      | 0 | 11 | 13 |
| NSL 2840-4  | Mexico | N10      | 0 | 15 | 9  |
| NSL 2840-5  | Mexico | N10      | 0 | 10 | 15 |
| NSL 2840-6  | Mexico | N10      | 0 | 13 | 11 |
| NSL 2840-7  | Mexico | N10      | 0 | 12 | 13 |
| NSL 2840-8  | Mexico | N10      | 0 | 9  | 12 |
| NSL 2840-9  | Mexico | N10      | 0 | 14 | 13 |
| NSL 2840-10 | Mexico | N10      | 0 | 16 | 10 |
| NSL 2841-1  | Mexico | K10L2    | 0 | 4  | 12 |
| NSL 2841-2  | Mexico | K10L2    | 1 | 10 | 8  |
| NSL 2841-3  | Mexico | K10L2    | 0 | 7  | 11 |
| NSL 2841-4  | Mexico | K10L2    | 1 | 5  | 10 |
| NSL 2841-5  | Mexico | K10L2    | 0 | 6  | 10 |
| NSL 2841-6  | Mexico | K10L2    | 0 | 6  | 11 |
| NSL 2841-7  | Mexico | N10      | 0 | 4  | 9  |
| NSL 2843-1  | Mexico | N10      | 0 | 8  | 5  |

|              |                   |          |   |    |    |
|--------------|-------------------|----------|---|----|----|
| NSL 2843-2   | Mexico            | N10      | 3 | 10 | 5  |
| NSL 2843-3   | Mexico            | N10      | 0 | 10 | 4  |
| NSL 2843-4   | Mexico            | N10      | 2 | 9  | 4  |
| NSL 2843-5   | Mexico            | N10      | 1 | 11 | 3  |
| NSL2844-1    | Mexico            | N10      | 1 | 8  | 6  |
| NSL2844-2    | Mexico            | Ab10-I   | 1 | 8  | 11 |
| NSL2844-3    | Mexico            | N10      | 0 | 7  | 9  |
| NSL2844-4    | Mexico            | N10      | 0 | 12 | 4  |
| NSL2844-5    | Mexico            | N10      | 0 | 12 | 7  |
| PI 217409-1  | Mexico            | N10      | 0 | 11 | 9  |
| PI 217409-2  | Mexico            | N10      | 0 | 12 | 9  |
| PI 217409-3  | Mexico            | N10      | 1 | 9  | 10 |
| PI 217409-4  | Mexico            | N10      | 0 | 12 | 10 |
| PI 217409-5  | Mexico            | N10      | 2 | 12 | 10 |
| PI 217409-6  | Mexico            | N10      | 0 | 9  | 11 |
| PI 217409-7  | Mexico            | N10      | 0 | 7  | 13 |
| PI 217409-8  | Mexico            | N10      | 0 | 9  | 11 |
| PI 217409-9  | Mexico            | N10      | 0 | 6  | 10 |
| PI 420244-1  | Sonora, Mexico    | N10      | 1 | 10 | 9  |
| PI 420244-2  | Sonora, Mexico    | N10      | 0 | 9  | 9  |
| PI 420244-3  | Sonora, Mexico    | K10L2    | 1 | 10 | 8  |
| PI 420244-4  | Sonora, Mexico    | N10      | 0 | 8  | 13 |
| PI 420244-5  | Sonora, Mexico    | N10      | 0 | 9  | 13 |
| PI 435329-1  | Bolivia           | N10      | 2 | 6  | 8  |
| PI 435329-2  | Bolivia           | Ab10-III | 0 | 5  | 9  |
| PI 435329-3  | Bolivia           | Ab10-III | 3 | 5  | 7  |
| PI 435329-4  | Bolivia           | N10      | 0 | 5  | 8  |
| PI 435329-5  | Bolivia           | N10      | 3 | 8  | 6  |
| PI 435329-6  | Bolivia           | N10      | 3 | 6  | 8  |
| PI 444296-1  | Caqueta, Colombia | N10      | 1 | 12 | 8  |
| PI 444296-2  | Caqueta, Colombia | N10      | 0 | 11 | 10 |
| PI 444296-3  | Caqueta, Colombia | N10      | 0 | 13 | 10 |
| PI 444296-4  | Caqueta, Colombia | Ab10-III | 0 | 9  | 6  |
| PI 444296-5  | Caqueta, Colombia | Ab10-III | 2 | 8  | 11 |
| PI 444296-6  | Caqueta, Colombia | N10      | 2 | 11 | 8  |
| PI 444296-7  | Caqueta, Colombia | Ab10-III | 1 | 13 | 8  |
| PI 444296-8  | Caqueta, Colombia | Ab10-III | 0 | 8  | 11 |
| PI 444296-9  | Caqueta, Colombia | N10      | 0 | 7  | 13 |
| PI 444296-10 | Caqueta, Colombia | Ab10-III | 0 | 9  | 11 |
| PI 444296-11 | Caqueta, Colombia | N10      | 1 | 11 | 9  |
| PI 444834-1  | Huila, Colombia   | N10      | 2 | 10 | 9  |
| PI 444834-2  | Huila, Colombia   | N10      | 3 | 11 | 7  |

|             |                       |          |   |    |    |
|-------------|-----------------------|----------|---|----|----|
| PI 444834-3 | Huila, Colombia       | N10      | 0 | 6  | 12 |
| PI 444834-4 | Huila, Colombia       | Ab10-III | 3 | 8  | 11 |
| PI 444834-5 | Huila, Colombia       | N10      | 0 | 11 | 9  |
| PI 444834-6 | Huila, Colombia       | N10      | 0 | 11 | 11 |
| PI 444834-7 | Huila, Colombia       | N10      | 1 | 13 | 10 |
| PI 444834-8 | Huila, Colombia       | N10      | 1 | 9  | 10 |
| PI 444834-9 | Huila, Colombia       | N10      | 0 | 14 | 11 |
| PI 444954-1 | Magdalena, Colombia   | N10      | 1 | 11 | 5  |
| PI 444954-2 | Magdalena, Colombia   | N10      | 1 | 13 | 8  |
| PI 444954-3 | Magdalena, Colombia   | N10      | 1 | 8  | 7  |
| PI 444954-4 | Magdalena, Colombia   | N10      | 0 | 13 | 11 |
| PI 444954-5 | Magdalena, Colombia   | N10      | 0 | 12 | 8  |
| PI 444954-6 | Magdalena, Colombia   | N10      | 1 | 13 | 7  |
| PI 445007-1 | Magdalena, Colombia   | N10      | 0 | 7  | 7  |
| PI 445007-2 | Magdalena, Colombia   | N10      | 2 | 4  | 8  |
| PI 445007-3 | Magdalena, Colombia   | N10      | 0 | 9  | 8  |
| PI 445007-4 | Magdalena, Colombia   | N10      | 0 | 8  | 10 |
| PI 445007-5 | Magdalena, Colombia   | N10      | 0 | 10 | 10 |
| PI 445007-6 | Magdalena, Colombia   | N10      | 0 | 8  | 7  |
| PI 445007-7 | Magdalena, Colombia   | N10      | 3 | 11 | 7  |
| PI 445379-1 | Santander, Colombia   | N10      | 3 | 9  | 4  |
| PI 445379-2 | Santander, Colombia   | N10      | 0 | 8  | 4  |
| PI 445379-3 | Santander, Colombia   | Ab10-I   | 0 | 8  | 9  |
| PI 445379-4 | Santander, Colombia   | N10      | 3 | 5  | 5  |
| PI 445379-5 | Santander, Colombia   | Ab10-I   | 2 | 11 | 7  |
| PI 445379-6 | Santander, Colombia   | Ab10-I   | 0 | 12 | 7  |
| PI 445379-7 | Santander, Colombia   | N10      | 2 | 9  | 6  |
| PI 483314-1 | South Carolina, USA   | N10      | 0 | 7  | 8  |
| PI 483314-2 | South Carolina, USA   | N10      | 1 | 12 | 5  |
| PI 483314-3 | South Carolina, USA   | N10      | 1 | 7  | 6  |
| PI 483314-4 | South Carolina, USA   | N10      | 0 | 8  | 8  |
| PI 483314-5 | South Carolina, USA   | N10      | 1 | 8  | 4  |
| PI 483314-6 | South Carolina, USA   | N10      | 1 | 11 | 4  |
| PI 483314-7 | South Carolina, USA   | N10      | 1 | 7  | 4  |
| PI 490825-1 | Chiquimula, Guatemala | N10      | 2 | 8  | 10 |
| PI 490825-2 | Chiquimula, Guatemala | Ab10-III | 1 | 10 | 14 |
| PI 490825-3 | Chiquimula, Guatemala | N10      | 1 | 10 | 13 |
| PI 490825-4 | Chiquimula, Guatemala | N10      | 0 | 8  | 14 |
| PI 490825-5 | Chiquimula, Guatemala | N10      | 0 | 9  | 14 |
| PI 490825-6 | Chiquimula, Guatemala | N10      | 0 | 9  | 14 |
| PI 490825-7 | Chiquimula, Guatemala | Ab10-III | 0 | 10 | 14 |
| PI 490825-8 | Chiquimula, Guatemala | N10      | 0 | 11 | 13 |

|              |                       |          |   |    |    |
|--------------|-----------------------|----------|---|----|----|
| PI 490825-9  | Chiquimula, Guatemala | Ab10-III | 0 | 10 | 13 |
| PI 490825-10 | Chiquimula, Guatemala | Ab10-III | 0 | 10 | 13 |
| PI 490825-11 | Chiquimula, Guatemala | N10      | 0 | 11 | 12 |
| PI 490825-12 | Chiquimula, Guatemala | N10      | 1 | 9  | 11 |
| PI 490825-13 | Chiquimula, Guatemala | Ab10-III | 0 | 11 | 12 |
| PI 490825-14 | Chiquimula, Guatemala | Ab10-III | 0 | 9  | 12 |
| PI 490921-1  | Nayarit, Mexico       | N10      | 0 | 11 | 6  |
| PI 490921-2  | Nayarit, Mexico       | N10      | 1 | 13 | 8  |
| PI 490921-3  | Nayarit, Mexico       | N10      | 0 | 10 | 6  |
| PI 490921-4  | Nayarit, Mexico       | N10      | 0 | 13 | 8  |
| PI 490921-5  | Nayarit, Mexico       | N10      | 0 | 8  | 7  |
| PI 490921-6  | Nayarit, Mexico       | N10      | 0 | 2  | 7  |
| PI 490921-7  | Nayarit, Mexico       | N10      | 0 | 2  | 8  |
| PI 490921-8  | Nayarit, Mexico       | N10      | 0 | 8  | 10 |
| PI 490921-9  | Nayarit, Mexico       | N10      | 1 | 12 | 7  |
| PI 503574-1  | Sinaloa, Mexico       | K10L2    | 1 | 11 | 6  |
| PI 503574-2  | Sinaloa, Mexico       | K10L2    | 1 | 11 | 10 |
| PI 503574-3  | Sinaloa, Mexico       | N10      | 0 | 12 | 11 |
| PI 503574-4  | Sinaloa, Mexico       | N10      | 0 | 12 | 11 |
| PI 503574-5  | Sinaloa, Mexico       | N10      | 2 | 11 | 7  |
| PI 503574-6  | Sinaloa, Mexico       | N10      | 0 | 10 | 6  |
| PI 503574-7  | Sinaloa, Mexico       | N10      | 0 | 11 | 9  |
| PI 620775-1  | Chiapas, Mexico       | K10L2    | 0 | 10 | 9  |
| PI 620775-2  | Chiapas, Mexico       | N10      | 0 | 11 | 14 |
| PI 620775-3  | Chiapas, Mexico       | N10      | 0 | 11 | 10 |
| PI 620775-4  | Chiapas, Mexico       | N10      | 0 | 8  | 10 |
| PI 620775-5  | Chiapas, Mexico       | K10L2    | 1 | 10 | 9  |
| PI 620775-6  | Chiapas, Mexico       | K10L2    | 2 | 7  | 3  |
| PI 620775-7  | Chiapas, Mexico       | N10      | 0 | 10 | 7  |
| PI 620775-8  | Chiapas, Mexico       | K10L2    | 0 | 6  | 6  |
| PI 620831-1  | Mexico, Mexico        | K10L2    | 0 | 8  | 5  |
| PI 620831-2  | Mexico, Mexico        | N10      | 1 | 5  | 7  |
| PI 620831-3  | Mexico, Mexico        | N10      | 0 | 4  | 6  |
| PI 620831-4  | Mexico, Mexico        | N10      | 0 | 8  | 6  |
| PI 620831-5  | Mexico, Mexico        | N10      | 0 | 6  | 6  |
| PI 620831-6  | Mexico, Mexico        | K10L2    | 0 | 8  | 6  |
| PI 620831-7  | Mexico, Mexico        | N10      | 1 | 9  | 3  |
| PI 620831-8  | Mexico, Mexico        | N10      | 0 | 8  | 4  |
| PI 620859-1  | Sonora, Mexico        | K10L2    | 1 | 9  | 11 |
| PI 620859-2  | Sonora, Mexico        | Ab10-III | 0 | 10 | 11 |
| PI 620859-3  | Sonora, Mexico        | N10      | 1 | 11 | 7  |
| PI 620859-4  | Sonora, Mexico        | N10      | 0 | 6  | 10 |

|              |                        |        |   |    |    |
|--------------|------------------------|--------|---|----|----|
| PI 620859-5  | Sonora, Mexico         | N10    | 0 | 11 | 9  |
| PI 620859-6  | Sonora, Mexico         | N10    | 1 | 8  | 11 |
| PI 628470-1  | Oaxaca, Mexico         | N10    | 1 | 16 | 11 |
| PI 628470-2  | Oaxaca, Mexico         | N10    | 1 | 12 | 12 |
| PI 628470-3  | Oaxaca, Mexico         | N10    | 0 | 13 | 13 |
| PI 628470-4  | Oaxaca, Mexico         | N10    | 1 | 12 | 13 |
| PI 628470-5  | Oaxaca, Mexico         | N10    | 0 | 14 | 15 |
| PI 628473-1  | Oaxaca, Mexico         | N10    | 0 | 7  | 14 |
| PI 628473-2  | Oaxaca, Mexico         | N10    | 0 | 11 | 15 |
| PI 628473-3  | Oaxaca, Mexico         | N10    | 0 | 12 | 15 |
| PI 628473-4  | Oaxaca, Mexico         | N10    | 1 | 10 | 13 |
| PI 628473-5  | Oaxaca, Mexico         | N10    | 0 | 8  | 12 |
| PI 645866-1  | Mexico, Mexico         | N10    | 0 | 10 | 4  |
| PI 645866-2  | Mexico, Mexico         | N10    | 1 | 9  | 5  |
| PI 645866-3  | Mexico, Mexico         | N10    | 0 | 9  | 5  |
| PI 645866-4  | Mexico, Mexico         | N10    | 0 | 11 | 4  |
| PI 645866-5  | Mexico, Mexico         | N10    | 0 | 10 | 5  |
| PI 645866-6  | Mexico, Mexico         | N10    | 0 | 8  | 6  |
| PI 645866-7  | Mexico, Mexico         | N10    | 0 | 4  | 11 |
| PI 645866-8  | Mexico, Mexico         | Ab10-I | 1 | 9  | 3  |
| PI 645866-9  | Mexico, Mexico         | N10    | 1 | 9  | 6  |
| PI 645866-10 | Mexico, Mexico         | N10    | 0 | 10 | 3  |
| PI 645866-11 | Mexico, Mexico         | N10    | 1 | 11 | 4  |
| PI 645891-1  | Michoacan, Mexico      | N10    | 1 | 3  | 2  |
| PI 645891-2  | Michoacan, Mexico      | N10    | 1 | 4  | 6  |
| PI 645891-3  | Michoacan, Mexico      | N10    | 0 | 10 | 2  |
| PI 645891-4  | Michoacan, Mexico      | N10    | 0 | 9  | 2  |
| PI 645891-5  | Michoacan, Mexico      | N10    | 0 | 7  | 2  |
| PI 645891-6  | Michoacan, Mexico      | N10    | 0 | 8  | 2  |
| PI 645933-1  | Oaxaca, Mexico         | N10    | 0 | 12 | 6  |
| PI 645933-2  | Oaxaca, Mexico         | N10    | 2 | 11 | 7  |
| PI 645933-3  | Oaxaca, Mexico         | N10    | 0 | 10 | 6  |
| PI 645933-4  | Oaxaca, Mexico         | N10    | 0 | 11 | 8  |
| PI 645933-5  | Oaxaca, Mexico         | N10    | 0 | 11 | 11 |
| PI628445-1   | Jalisco, Mexico        | Ab10-I | 0 | 9  | 7  |
| PI628445-2   | Jalisco, Mexico        | Ab10-I | 0 | 4  | 13 |
| PI628445-3   | Jalisco, Mexico        | Ab10-I | 0 | 14 | 13 |
| PI628445-4   | Jalisco, Mexico        | Ab10-I | 0 | 12 | 8  |
| PI628445-5   | Jalisco, Mexico        | N10    | 0 | 10 | 4  |
| PI628445-6   | Jalisco, Mexico        | N10    | 0 | 8  | 7  |
| PI444541 - 1 | Cundinamarca, Colombia | N10    | 2 | 10 | 9  |
| PI444541 - 2 | Cundinamarca, Colombia | N10    | 1 | 7  | 6  |

|              |                                 |        |   |    |   |
|--------------|---------------------------------|--------|---|----|---|
| PI444541 - 3 | Cundinamarca, Colombia          | N10    | 2 | 9  | 7 |
| PI444541 - 4 | Cundinamarca, Colombia          | Ab10-I | 1 | 10 | 8 |
| PI444541 - 5 | Cundinamarca, Colombia          | N10    | 0 | 10 | 5 |
| PI444541 - 6 | Cundinamarca, Colombia          | N10    | 2 | 12 | 6 |
| PI444541 - 7 | Cundinamarca, Colombia          | Ab10-I | 1 | 10 | 9 |
| PI444541 - 8 | Cundinamarca, Colombia          | Ab10-I | 1 | 12 | 6 |
| PI445323 - 1 | Norte de Santander,<br>Colombia | N10    | 1 | 10 | 2 |
| PI445323 - 2 | Norte de Santander,<br>Colombia | N10    | 2 | 6  | 3 |
| PI445323 - 3 | Norte de Santander,<br>Colombia | N10    | 2 | 6  | 4 |
| PI445323 - 4 | Norte de Santander,<br>Colombia | N10    | 0 | 10 | 3 |
| PI445323 - 5 | Norte de Santander,<br>Colombia | K10L2  | 3 | 6  | 1 |
